# Supplementary material for: Histological and genetic characterization and follow-up of 130 patients with chronic triple-negative thrombocytosis
Source: PubMed Central journal article supplement — Haematologica. 2022 Jul 14;107(11):2725–31. doi: 10.3324/haematol.2022.280917 (PMC9614530; doi:10.3324/haematol.2022.280917), 2022-07-14
Supplement: 2022_280917_LEMOINE_SUPPL.pdf [file 2022_280917_LEMOINE_SUPPL.pdf]

# Histological and genetic characterization and follow-up of 130 patients with chronic triple-negative thrombocytosis

Sandrine Lemoine,<sup>1-4</sup> Clelia Mornet,<sup>4,5</sup> Isabelle Quintin-Roue,<sup>6</sup> Marie-Christine Rousselet,<sup>7</sup> Laurane Cottin,<sup>1-4</sup> Aurélie Georgeais,<sup>5</sup> Ludovic Dubouis,<sup>8</sup> Françoise Boyer,<sup>3,4,9</sup> Corentin Orvain,<sup>2-4,9</sup> Clara Caillon,<sup>3,9</sup> Maxime Renard,<sup>1,3</sup> Valoris Le Brun,<sup>3,5</sup> Lenaig Le Clech,<sup>10</sup> Jean-Christophe Ianotto,<sup>3,4,11,12</sup> Emmanuelle Génin,<sup>13</sup> Barbara Burroni,<sup>4,14,15</sup> Valérie Ugo,<sup>1-4</sup> Damien Luque Paz<sup>1-4#</sup> and Eric Lippert<sup>3-5,13#</sup>

<sup>1</sup>Laboratoire d'Hématologie, CHU Angers, Angers; <sup>2</sup>Université d'Angers, Nantes Université, CHU Angers, Inserm, CNRS, CRCI2NA, Angers; <sup>3</sup>Fédération Hospitalo-Universitaire "Grand Ouest Against Leukemia" (FHU GOAL), Angers; <sup>4</sup>France Intergroupe des Syndromes Myéloprolifératifs (FIM), Paris; <sup>5</sup>Laboratoire d'Hématologie, CHRU Brest, Brest; <sup>6</sup>Département de Pathologie Cellulaire et Tissulaire, CHRU Brest, Brest; <sup>7</sup>Département de Pathologie Cellulaire et Tissulaire, CHU Angers, Angers; <sup>8</sup>Laboratoire de Biopathologie, CHRU Nancy, Nancy; <sup>9</sup>Service des Maladies du Sang, CHU Angers, Angers; <sup>10</sup>Service d'Hématologie Clinique, CHIC de Quimper, Quimper; <sup>11</sup>Service d'Hématologie Clinique, CHRU Brest, Brest; <sup>12</sup>Université Brest, Inserm, GETBO, Brest; <sup>13</sup>Université Brest, Inserm, EFS, UMR 1078, GGB, Brest; <sup>14</sup>Service de Pathologie, AP-HP, Hôpital Cochin, Paris and <sup>15</sup>Centre de Recherche des Cordeliers, Sorbonne Université, Inserm, Université de Paris, Paris, France.

*#DLP and EL contributed equally as co-senior authors.*

Correspondence:

E. LIPPERT - eric.lippert@chu-brest.fr

<https://doi.org/10.3324/haematol.2022.280917>

# Supplemental Data

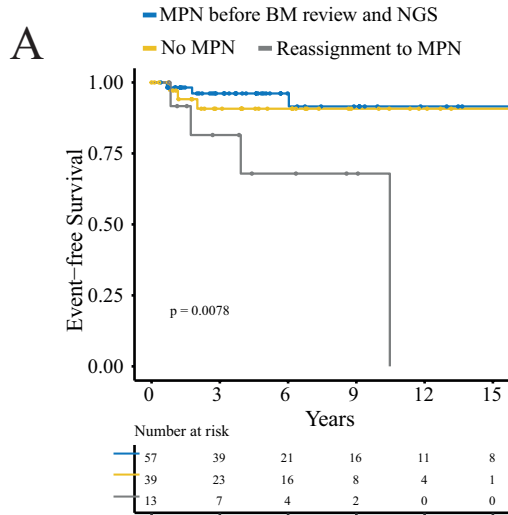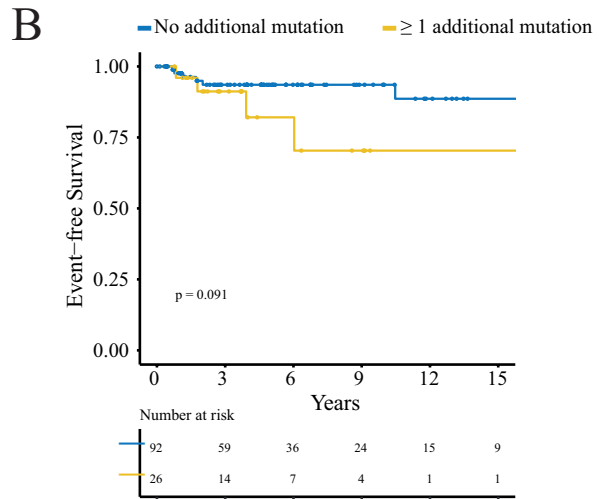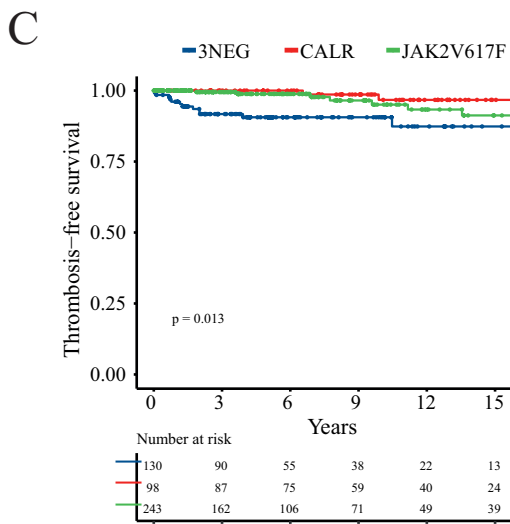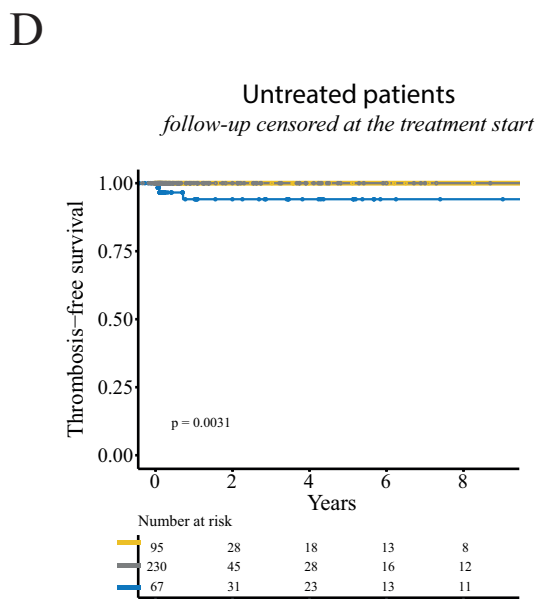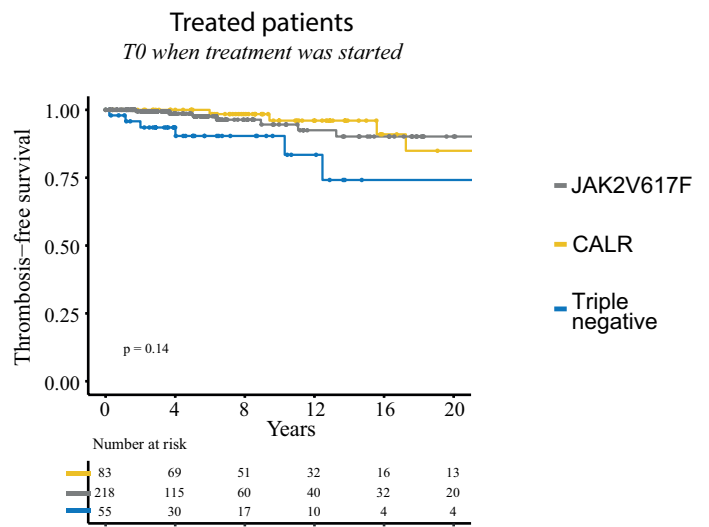

Figure S1: Outcomes of patients with Triple Negative Thrombocytosis.

(A) Kaplan-Meier curve representing the event free survival according to the reassignment after BMB review and NGS; (B) Kaplan-Meier curve representing the event free survival according to the presence of pathogenic or likely pathogenic mutation (constitutional thrombocythemia were excluded) ; (C) Kaplan-Meier curve representing thrombosis free survival according to the driver mutation; (D) Kaplan-Meier curves representing the sensitivity analysis of thrombosis-free survival of triple negative ET compared to *JAK2V617F*- and *CALR*-mutated controls, in untreated and treated patients considering only triple negative patients with either a histology of MPN or a clonal marker detected by NGS (related to Figure 1C).

| Panel of 24 genes used in target next generation sequencing (NGS) : |                                     |                                                                                                                                                                                                                                                                          |              |               |              |              |               |
|---------------------------------------------------------------------|-------------------------------------|--------------------------------------------------------------------------------------------------------------------------------------------------------------------------------------------------------------------------------------------------------------------------|--------------|---------------|--------------|--------------|---------------|
| <i>ASXL1</i>                                                        | <i>BCOR</i>                         | <i>CBL</i>                                                                                                                                                                                                                                                               | <i>CSF3R</i> | <i>DNMT3A</i> | <i>ETNK1</i> | <i>ETV6</i>  | <i>EZH2</i>   |
| <i>IDH1</i>                                                         | <i>IDH2</i>                         | <i>JAK2</i>                                                                                                                                                                                                                                                              | <i>KRAS</i>  | <i>MPL</i>    | <i>NRAS</i>  | <i>RUNX1</i> | <i>SETBP1</i> |
| <i>SF3B1</i>                                                        | <i>SH2B3</i>                        | <i>SRSF2</i>                                                                                                                                                                                                                                                             | <i>STAG2</i> | <i>TET2</i>   | <i>TP53</i>  | <i>U2AF1</i> | <i>ZRSR2</i>  |
| Variant classification :                                            |                                     |                                                                                                                                                                                                                                                                          |              |               |              |              |               |
| Type                                                                | Signification                       | Criteria                                                                                                                                                                                                                                                                 |              |               |              |              |               |
| <b>A</b>                                                            | <b>Pathogenic</b>                   | Deleterious variant described in myeloid neoplasms in COSMIC and validated somatic.<br><br>Undescribed variant causing a truncated protein.                                                                                                                              |              |               |              |              |               |
| <b>B</b>                                                            | <b>Likely pathogenic</b>            | Variant described in myeloid neoplasms in COSMIC but not validated somatic, absent from the "SNP" bases or with MAF <0.01 (1%).<br><br>Variant not described in myeloid neoplasms in COSMIC, with MAF <0.01 (1%) and described as deleterious by Polyphen and / or SIFT. |              |               |              |              |               |
| <b>VUS</b>                                                          | <b>Of undetermined significance</b> | Variant not described in myeloid neoplasms in COSMIC, with MAF <0.01 (1%) without impact predicted by Polyphen and SIFT.                                                                                                                                                 |              |               |              |              |               |
| <b>D</b>                                                            | <b>Germline</b>                     | Constitutional status, controlled on nail DNA and/or described constitutional in literature.<br><br>Or likely constitutional (JAK2 and MPL variants with VAF ≈ 50%, without germline control available).                                                                 |              |               |              |              |               |

**Table S1:** Panel of 24 genes used in targeted next generation sequencing (NGS) and variant classification according to the presumed impact on protein function.

The analysis of mutations was performed with targeted next generation sequencing (NGS), in each center, using a custom targeted panel of all coding exons of 24 genes. DNA libraries, built with the Sureselect® target enrichment protocol (Agilent Technologies, Santa Clara, CA, USA), were paired-end sequenced with a NextSeq 500® (Angers) or MiniSeq (Brest) Instrument (Illumina, San Diego, CA, USA). Variants were called using an in-house pipeline including trimmed reads alignment to the GRCh37 human reference genome, tumor variants detection by several variants callers (GATK HaplotypeCaller, VarScan) followed by annotation with public databases (gnomAD, COSMIC, dbSNP, ClinVar) and in silico predictors in the case of unknown variants (SIFT, PolyPhen-2), using updated versions whenever available. Mutations were considered significant if they reached a good quality score, a minimum variant allele frequency of at least 2% and a minimum of 20 reads supporting the variant for hotspots or 50 reads for non-hotspot variants. After removing polymorphisms (MAF>0.1%), intronic and synonymous variants, mutations were classified as either (i) pathogenic (non-sense/frameshifts or, previously described in myeloid malignancies) (ii) likely pathogenic (VAF <40% or >60%), (iii) germline (controlled on nail DNA and/or described germline in the literature or (iv) likely germline variants with VAF≈50% without germline control available.

| Pt #  | Age at diag. | Sex | Hgb g/L | Platelets (×10 <sup>9</sup> /L) | Leukocytes (×10 <sup>9</sup> /L) | Neutro (×10 <sup>9</sup> /L) | LDH ratio | CD 34+ (cells/×10 <sup>-6</sup> L) | SMG | History of thrombosis | Cyto-reduction | Initial Diag. | Diag. with BMB review | Mutations (VAF)                                                                                           | Diag. with NGS |
|-------|--------------|-----|---------|---------------------------------|----------------------------------|------------------------------|-----------|------------------------------------|-----|-----------------------|----------------|---------------|-----------------------|-----------------------------------------------------------------------------------------------------------|----------------|
| A_001 | 60           | M   | 148     | 1700                            | 9.3                              | 8.0                          | 1.8       | 5.5                                | N   | N                     | Y              | ET            | ET                    | <i>MPL</i> S505N (25%) / <i>DNMT3A</i> R882H (31%)                                                        | ET             |
| A_002 | 68           | F   | 132     | 713                             | 6.8                              | 4.5                          | 0.7       | 3.5                                | N   | N                     | Y              | ET            | MPN                   | <i>TET2</i> L957Tfs*13 (8%) / <i>TET2</i> Q860X (3%)                                                      | MPN            |
| A_003 | 38           | M   | 136     | 685                             | 5.7                              | 3.7                          | 1.1       | 4.0                                | Y   | Y                     | Y              | ET            | ET                    | /                                                                                                         | ET             |
| A_004 | 32           | M   | 89      | 1990                            | 12.0                             | 8.3                          | 1.5       | NR                                 | N   | N                     | Y              | No MPN        | No MPN                | <i>ASXL1</i> D1180E (47%) / <i>SH2B3</i> R265Q (48%)                                                      | No MPN         |
| A_006 | 29           | F   | 140     | 969                             | 6.7                              | 3.8                          | 0.7       | 2.9                                | N   | N                     | N              | ET            | not reviewed          | /                                                                                                         | ET             |
| A_007 | 84           | F   | 153     | 765                             | 7.6                              | 4.6                          | 1.3       | 2.0                                | N   | N                     | Y              | ET            | ET                    | <i>CBL</i> C404Y (4%)                                                                                     | ET             |
| A_008 | 67           | F   | 125     | 996                             | 10.3                             | 7.3                          | 1.1       | 1.9                                | N   | N                     | Y              | ET            | pMF                   | /                                                                                                         | pMF            |
| A_009 | 37           | F   | 150     | 714                             | 14.8                             | 9.9                          | 0.8       | 4.0                                | N   | N                     | N              | No MPN        | not reviewed          | <i>SH2B3</i> R566Q (50%) / <i>ASXL1</i> A889P(49%)                                                        | No MPN         |
| A_010 | 63           | M   | 157     | 822                             | 6.9                              | 4.4                          | 0.6       | 2.7                                | N   | N                     | Y              | pMF           | pMF                   | /                                                                                                         | pMF            |
| A_011 | 65           | F   | 127     | 698                             | 4.2                              | 2.3                          | 0.7       | 1.9                                | N   | N                     | Y              | ET            | not reviewed          | <i>MPL</i> W515A (12%) / <i>TET2</i> N1387S (4%) / <i>TET2</i> H1904D (2%)                                | ET             |
| A_012 | 56           | M   | 150     | 664                             | 7.2                              | 4.6                          | 1.0       | 3.3                                | N   | N                     | N              | ET            | ET                    | <i>DNMT3A</i> F354Sfs*52 (5%)                                                                             | ET             |
| A_013 | 59           | F   | 117     | 812                             | 10.2                             | 6.3                          | 2.5       | NR                                 | N   | Y                     | Y              | ET            | ET                    | /                                                                                                         | ET             |
| A_015 | 48           | F   | 135     | 699                             | 6.2                              | 2.5                          | NR        | NR                                 | N   | Y                     | Y              | ET            | not reviewed          | <i>ASXL1</i> G646Wfs*12 (2%) / <i>SH2B3</i> S433L (94%) / <i>TP53</i> G245D (5%) / <i>TP53</i> R248W (2%) | ET             |
| A_016 | 77           | F   | 115     | 556                             | 5.4                              | 3.4                          | 0.9       | 0.8                                | N   | N                     | N              | pMF           | No MPN                | <i>DNMT3A</i> Y735C (2%) / <i>BCOR</i> R63K (53%)                                                         | MPN            |
| A_017 | 51           | F   | 138     | 512                             | 8.1                              | 4.7                          | 0.8       | 2.1                                | N   | N                     | N              | ET            | No MPN                | /                                                                                                         | No MPN         |
| A_018 | 70           | F   | 120     | 531                             | 8.0                              | 5.2                          | 0.7       | 6.8                                | N   | N                     | N              | No MPN        | unclear               | /                                                                                                         | unclear        |
| A_019 | 67           | M   | 135     | 679                             | 6.7                              | 3.9                          | 1.4       | 8,0                                | N   | N                     | Y              | ET            | ET                    | <i>SH2B3</i> S417X (4%)                                                                                   | ET             |
| A_020 | 69           | M   | 145     | 482                             | 6.0                              | 3.7                          | 0.8       | 4.1                                | N   | Y                     | Y              | MPN           | ET                    | /                                                                                                         | ET             |
| A_021 | 73           | F   | 134     | 504                             | 8.5                              | 4.8                          | 0.8       | 3.6                                | N   | N                     | N              | No MPN        | MPN                   | <i>DNMT3A</i> R635Q (11%)                                                                                 | MPN            |
| A_023 | 78           | M   | 139     | 684                             | 8.5                              | 6.3                          | 0.7       | 2.8                                | Y   | N                     | Y              | ET            | No MPN                | /                                                                                                         | No MPN         |
| A_024 | 78           | F   | 142     | 779                             | 9.07                             | 5.62                         | 1.2       | 2.3                                | N   | N                     | Y              | ET            | MPN                   | <i>MPL</i> W515S (10%) / <i>JAK2</i> V617I (12%) / <i>TET2</i> A1301fs (7%) / <i>SF3B1</i> G742D (7%)     | MPN            |
| A_025 | 51           | F   | 115     | 1010                            | 6.0                              | 3.8                          | NR        | 1.8                                | N   | N                     | N              | ET            | ET                    | /                                                                                                         | ET             |
| A_026 | 36           | F   | NR      | 1800                            | NR                               | NR                           | NR        | NR                                 | N   | N                     | Y              | ET            | not reviewed          | /                                                                                                         | ET             |
| A_029 | 42           | M   | 140     | 659                             | 6.0                              | 4.4                          | 0.8       | 3.0                                | Y   | N                     | N              | ET            | ET                    | /                                                                                                         | ET             |
| A_030 | 49           | M   | 151     | 680                             | 5.0                              | 4.5                          | 1.0       | 2.3                                | N   | N                     | Y              | ET            | ET                    | /                                                                                                         | ET             |
| A_031 | 35           | F   | 135     | 527                             | 6.7                              | 4.8                          | 0.9       | 2.3                                | N   | N                     | N              | MPN           | ET                    | /                                                                                                         | ET             |
| A_032 | 62           | F   | 123     | 827                             | 5.5                              | 2.9                          | NR        | NR                                 | N   | N                     | Y              | ET            | not                   | <i>ASXL1</i> G680C (48%) / <i>ZRSR2</i> S445_R448del (43%)                                                | ET             |

|       |    |   |     |      |      |      |     |      |   |   |   |        |              |                                                                                                                     |         |
|-------|----|---|-----|------|------|------|-----|------|---|---|---|--------|--------------|---------------------------------------------------------------------------------------------------------------------|---------|
|       |    |   |     |      |      |      |     |      |   |   |   |        | reviewed     |                                                                                                                     |         |
| A_033 | 59 | F | 131 | 649  | 8.8  | 6.7  | 1.2 | 5.12 | N | N | Y | ET     | ET           | MPL S204P (2%)                                                                                                      | ET      |
| A_034 | 24 | F | 134 | 598  | 11.9 | 8.8  | NR  | 1.7  | N | N | N | ET     | not reviewed | /                                                                                                                   | ET      |
| A_035 | 35 | F | 117 | 940  | 9.0  | 5.3  | 0.7 | 5.4  | N | N | N | ET     | ET           | /                                                                                                                   | ET      |
| A_037 | 69 | F | 113 | 828  | 7.7  | 6.4  | 1.1 | 2.3  | N | N | Y | ET     | unclear      | DMNT3A T835M (2%)                                                                                                   | MPN     |
| A_038 | 50 | M | 134 | 500  | 9.5  | 4.4  | 0.9 | 10.7 | N | Y | Y | ET     | No MPN       | /                                                                                                                   | No MPN  |
| A_039 | 63 | F | 135 | 1152 | 9.6  | 7.8  | 1.0 | 1.1  | N | N | Y | ET     | ET           | /                                                                                                                   | ET      |
| A_040 | 40 | M | 151 | 1069 | 10.7 | 7.4  | 0.9 | NR   | N | N | Y | ET     | not reviewed | /                                                                                                                   | ET      |
| A_041 | 56 | F | 138 | 1122 | 4.9  | 2.6  | 1.2 | NR   | Y | N | Y | ET     | ET           | MPL S264F (6%)                                                                                                      | ET      |
| A_042 | 53 | F | 156 | 579  | 9.0  | 6.3  | 0.7 | NR   | Y | N | N | No MPN | No MPN       | /                                                                                                                   | No MPN  |
| A_044 | 84 | F | 124 | 1200 | 10.4 | 7.4  | NR  | 11.3 | N | N | Y | ET     | ET           | MPL W515A (33%)                                                                                                     | ET      |
| A_045 | 74 | F | 146 | 682  | 6.1  | 3.84 | 1.1 | 1.5  | N | Y | Y | ET     | ET           | TET2 V1718L (51%)                                                                                                   | ET      |
| A_046 | 58 | F | 134 | 523  | 5.39 | 3.4  | 0.9 | 4.1  | N | N | N | MPN    | No MPN       | SH2B3 E449K (48%)                                                                                                   | No MPN  |
| A_047 | 46 | F | 131 | 1064 | 10.2 | 6.9  | 1.0 | 13.9 | N | N | N | ET     | ET           | SH2B3 P19L (54%)                                                                                                    | ET      |
| A_048 | 76 | F | 123 | 922  | 9.2  | 5.1  | 1.0 | 3.6  | N | N | Y | ET     | ET           | MPL L599P (11%) / CBL Y371C (3%) / TET2 E351X (13%) / TET2 Q1624X (33%) / EZH2 splicing (7%) / SH2B3 splicing (39%) | ET      |
| A_050 | 29 | F | 127 | 592  | 9.7  | 5.8  | 0.6 | NR   | N | N | N | No MPN | No MPN       | /                                                                                                                   | No MPN  |
| A_051 | 53 | F | 134 | 563  | 6.04 | 3.74 | 1.2 | 1.8  | Y | Y | N | MPN    | No MPN       | /                                                                                                                   | No MPN  |
| A_052 | 29 | F | 132 | 600  | 8.2  | 4.7  | 0.8 | 1.93 | N | N | N | ET     | ET           | SETBP1 R1162Q (48%)                                                                                                 | ET      |
| A_053 | 64 | F | 150 | 647  | 4.9  | 4.1  | 1.1 | 1.7  | N | N | Y | pMF    | pMF          | MPL S204P (87%) / TET2 H1036Qfs*5 (41%)                                                                             | pMF     |
| A_055 | 71 | M | 150 | 615  | 7.5  | 4.1  | 0.8 | 2.07 | N | N | Y | ET     | No MPN       | /                                                                                                                   | No MPN  |
| A_056 | 79 | F | 122 | 556  | 6.8  | 5.7  | 0.7 | 3.3  | N | N | N | No MPN | unclear      | /                                                                                                                   | unclear |
| A_057 | 25 | F | 134 | 572  | 5.7  | 3.3  | 0.6 | NR   | N | N | N | No MPN | No MPN       | /                                                                                                                   | No MPN  |
| A_058 | 52 | F | 150 | 469  | 8.5  | 5.8  | 1.0 | 3.7  | N | N | N | No MPN | No MPN       | /                                                                                                                   | No MPN  |
| A_060 | 23 | M | 149 | 668  | 7.2  | 4.4  | 0.8 | 3.2  | N | N | N | ET     | ET           | /                                                                                                                   | ET      |
| A_061 | 41 | F | 149 | 650  | 13.2 | 6.4  | 0.8 | 6.22 | N | N | Y | No MPN | No MPN       | ASXL1 Q695X (44%)                                                                                                   | MPN     |
| A_062 | 31 | F | 131 | 1115 | 6.5  | 3.9  | 1.0 | 2.42 | N | N | N | ET     | ET           | /                                                                                                                   | ET      |
| A_063 | 37 | M | 149 | 599  | 5.6  | 3.6  | 0.7 | 2.1  | N | Y | Y | ET     | ET           | /                                                                                                                   | ET      |
| A_064 | 59 | F | 150 | 837  | 10.9 | 7.3  | 1.1 | 4.0  | N | N | Y | ET     | unclear      | /                                                                                                                   | unclear |
| A_065 | 40 | F | 135 | 812  | 5.0  | 3.1  | 1.0 | 2.4  | N | N | N | No MPN | No MPN       | TET2 N767D (47%)                                                                                                    | No MPN  |
| B_003 | 18 | M | 153 | 1017 | 8.5  | 5.0  | 0.8 | NR   | N | N | Y | No MPN | not reviewed | /                                                                                                                   | No MPN  |
| B_004 | 18 | F | 107 | 980  | 9.4  | 6.3  | 1.0 | NR   | Y | N | N | ET     | ET           | MPL P200A (36%)                                                                                                     | ET      |
| B_005 | 20 | M | 158 | 1444 | 7.2  | 4.7  | 0.9 | 2.0  | N | N | Y | No MPN | not reviewed | /                                                                                                                   | No MPN  |

|       |    |   |     |      |      |      |     |     |    |   |   |         |              |                    |         |
|-------|----|---|-----|------|------|------|-----|-----|----|---|---|---------|--------------|--------------------|---------|
| B_007 | 23 | F | 136 | 550  | 10.7 | 7.8  | 0.7 | NR  | NR | N | Y | ET      | ET           | /                  | ET      |
| B_008 | 25 | F | 141 | 919  | 8.5  | 6.0  | 0.9 | NR  | N  | N | Y | No MPN  | ET           | ASXL1 S846N (51%)  | ET      |
| B_009 | 26 | M | 160 | 1484 | 8.5  | 5.1  | NR  | NR  | Y  | N | Y | ET      | not reviewed | /                  | ET      |
| B_012 | 27 | F | 127 | 520  | 13.9 | 8.38 | 0.7 | NR  | N  | N | N | No MPN  | No MPN       | /                  | No MPN  |
| B_013 | 28 | F | 132 | 489  | 7,0  | 4.2  | 0.7 | NR  | N  | N | N | ET      | ET           | /                  | ET      |
| B_014 | 28 | F | 110 | 606  | 15.1 | 9.3  | 0.8 | 2.0 | N  | N | N | No MPN  | No MPN       | /                  | No MPN  |
| B_015 | 32 | F | 135 | 522  | 6.8  | 4.5  | 0.9 | NR  | N  | N | Y | ET      | ET           | /                  | ET      |
| B_017 | 34 | F | 138 | 509  | 7.3  | 6.0  | 1.3 | NR  | N  | N | N | No MPN  | No MPN       | /                  | No MPN  |
| B_018 | 35 | F | 126 | 1342 | 9.7  | 6.4  | 1.0 | 2.0 | N  | N | Y | No MPN  | No MPN       | /                  | No MPN  |
| B_020 | 35 | F | 129 | 1040 | 9.1  | 6.6  | 0.0 | 2.0 | N  | N | N | ET      | ET           | CBL V904I (47%)    | ET      |
| B_023 | 43 | F | 131 | 966  | 8.9  | 6.8  | 1.3 | NR  | N  | N | Y | ET      | pMF          | BCOR S1223L (52%)  | pMF     |
| B_024 | 47 | M | 157 | 526  | 11.4 | 8.7  | 0.9 | NR  | N  | Y | Y | No MPN  | No MPN       | /                  | No MPN  |
| B_025 | 47 | M | 169 | 555  | 9.5  | 6.4  | 0.7 | 3.0 | N  | N | Y | No MPN  | No MPN       | /                  | No MPN  |
| B_026 | 47 | F | 144 | 1544 | 8.2  | 5.7  | 1.2 | NR  | N  | N | Y | unclear | not reviewed | /                  | unclear |
| B_027 | 48 | F | 136 | 536  | 9.8  | 5.8  | NR  | 2.0 | N  | N | N | ET      | ET           | SH2B3 S213R (54%)  | ET      |
| B_028 | 48 | F | 140 | 544  | 9.6  | 7.8  | 0.9 | 1.5 | N  | N | N | No MPN  | No MPN       | /                  | No MPN  |
| B_029 | 48 | F | 125 | 580  | 8.8  | 5.3  | 0.8 | NR  | N  | N | Y | unclear | not reviewed | /                  | unclear |
| B_030 | 51 | M | 150 | 521  | 10.8 | 8.7  | 0.9 | 4,0 | N  | N | N | No MPN  | No MPN       | /                  | No MPN  |
| B_032 | 54 | M | 154 | 557  | 4.9  | 2.7  | 0.8 | NR  | N  | N | N | No MPN  | No MPN       | /                  | No MPN  |
| B_033 | 55 | M | 111 | 773  | 13.6 | 11.8 | 1.6 | NR  | N  | N | Y | No MPN  | No MPN       | /                  | No MPN  |
| B_034 | 55 | F | 128 | 622  | 8.5  | 5.1  | 0.9 | NR  | N  | N | Y | ET      | ET           | /                  | ET      |
| B_035 | 55 | F | 141 | 477  | 7.4  | 4.7  | 0.8 | NR  | N  | N | N | No MPN  | No MPN       | /                  | No MPN  |
| B_036 | 56 | F | 126 | 472  | 4.9  | 2.7  | 1   | NR  | N  | N | Y | No MPN  | No MPN       | /                  | No MPN  |
| B_038 | 57 | M | 144 | 586  | 5.5  | 3.2  | 0.9 | NR  | N  | Y | N | No MPN  | ET           | SH2B3 S186I (54%)  | ET      |
| B_042 | 58 | F | 140 | 1286 | 7.4  | 4.4  | 1   | NR  | N  | N | Y | ET      | ET           | /                  | ET      |
| B_043 | 59 | M | 134 | 917  | 8.1  | 4.4  | 0.9 | 5.0 | N  | N | Y | ET      | ET           | /                  | ET      |
| B_044 | 59 | F | 138 | 922  | 9.8  | 7.6  | 1.4 | NR  | N  | N | Y | No MPN  | ET           | /                  | ET      |
| B_045 | 60 | F | 145 | 636  | 9.6  | 5.7  | 1.0 | 4.0 | N  | N | Y | No MPN  | No MPN       | /                  | No MPN  |
| B_046 | 61 | M | 126 | 1150 | 10.3 | 9.2  | 2   | NR  | Y  | Y | Y | ET      | not reviewed | /                  | ET      |
| B_048 | 62 | M | 118 | 600  | NR   | 10.8 | NR  | NR  | N  | Y | N | No MPN  | No MPN       | DNMT3A R882K (21%) | MPN     |
| B_049 | 62 | F | 137 | 537  | 4.7  | 2.7  | 1.0 | 3.0 | N  | N | N | unclear | unclear      | /                  | unclear |
| B_050 | 62 | M | 146 | 741  | 7.6  | 4.2  | 1.0 | 3.0 | N  | Y | Y | ET      | ET           | DNMT3A S663* (4%)  | ET      |

|              |    |   |     |      |      |      |     |      |    |    |   |         |              |                                                      |                  |
|--------------|----|---|-----|------|------|------|-----|------|----|----|---|---------|--------------|------------------------------------------------------|------------------|
| <b>B_051</b> | 63 | F | 143 | 468  | 9.5  | 5.7  | 1.0 | NR   | N  | Y  | Y | ET      | No MPN       | <b>ASXL1 G646Wfs*12 (10%)</b>                        | MPN              |
| <b>B_053</b> | 64 | M | 136 | 622  | 7.2  | 4.0  | 1.1 | NR   | N  | Y  | Y | ET      | ET           | /                                                    | ET               |
| <b>B_054</b> | 65 | F | 119 | 728  | 14.3 | 10.6 | 0.9 | NR   | N  | N  | Y | ET      | No MPN       | <b>DNMT3A N797D (37%)</b>                            | MPN              |
| <b>B_055</b> | 65 | F | 124 | 605  | 6.9  | 4.5  | 1.1 | 4.0  | N  | Y  | Y | No MPN  | No MPN       | /                                                    | No MPN           |
| <b>B_056</b> | 67 | M | 126 | 559  | 10.5 | 7.7  | 0.7 | NR   | N  | N  | Y | No MPN  | No MPN       | <b>KRAS M189L (52%)</b>                              | No MPN           |
| <b>B_058</b> | 69 | F | 150 | 707  | 7.6  | 5.9  | 1.1 | 3.0  | N  | N  | Y | ET      | ET           | /                                                    | ET               |
| <b>B_060</b> | 71 | M | 136 | 634  | 6.1  | 3.7  | 0.9 | NR   | N  | N  | Y | No MPN  | not reviewed | /                                                    | No MPN           |
| <b>B_061</b> | 73 | F | 134 | 577  | 10.3 | 7.1  | 0.8 | NR   | N  | Y  | Y | No MPN  | No MPN       | <b>ASXL1 E484G (47%) / SH2B3 E400K (33%)</b>         | MPN              |
| <b>B_063</b> | 74 | M | 132 | 755  | 10,0 | 8.1  | 1.0 | 14.0 | N  | N  | Y | ET      | ET           | /                                                    | ET               |
| <b>B_066</b> | 76 | F | 111 | 622  | 6.1  | 4.6  | 1.0 | NR   | N  | N  | Y | No MPN  | No MPN       | /                                                    | No MPN           |
| <b>B_067</b> | 78 | F | 130 | 626  | 11.4 | 9.7  | 1.2 | NR   | N  | N  | Y | No MPN  | No MPN       | /                                                    | No MPN           |
| <b>B_069</b> | 82 | F | 163 | 454  | 8,0  | 5.6  | 1.0 | 3.0  | N  | N  | Y | ET      | ET           | /                                                    | ET               |
| <b>B_070</b> | 82 | F | 155 | 550  | 23.8 | 22.4 | 1.1 | NR   | N  | N  | Y | unclear | unclear      | /                                                    | unclear          |
| <b>B_344</b> | 52 | M | 156 | 454  | 13.9 | 10.2 | 1.1 | 3.5  | N  | N  | N | No MPN  | No MPN       | /                                                    | No MPN           |
| <b>B_345</b> | 64 | M | 130 | 488  | 16,0 | 14.3 | NR  | 1,0  | N  | Y  | Y | No MPN  | No MPN       | /                                                    | No MPN           |
| <b>B_346</b> | 32 | F | 140 | 590  | 9.7  | 5.9  | 1.0 | 2,0  | N  | N  | N | No MPN  | No MPN       | /                                                    | No MPN           |
| <b>B_349</b> | 40 | F | 128 | 1068 | 8.3  | 5.5  | NR  | NR   | N  | N  | Y | ET      | not reviewed | /                                                    | ET               |
| <b>B_350</b> | 18 | F | 134 | 681  | 9.2  | 6.5  | 1.1 | 1.0  | N  | N  | N | ET      | not reviewed | <b>MPL P70R (21%)</b>                                | ET               |
| <b>B_351</b> | 18 | F | 147 | 785  | 16.0 | 11.7 | 0.0 | NR   | N  | N  | Y | ET      | not reviewed | /                                                    | ET               |
| <b>B_352</b> | 62 | F | 141 | 444  | 6.1  | 3.5  | 1.2 | 0.5  | N  | N  | N | unclear | not reviewed | <b>CBL L380P (3%) / ASXL1 Q977R (48%)</b>            | MPN              |
| <b>B_356</b> | 56 | F | 135 | 511  | 6.9  | 4.8  | 1.3 | NR   | NR | NR | Y | ET      | not reviewed | /                                                    | ET               |
| <b>B_357</b> | 39 | F | 143 | 442  | 6.8  | 4.7  | 0.9 | 1,0  | N  | N  | N | ET      | No MPN       | /                                                    | No MPN           |
| <b>B_360</b> | 67 | F | 135 | 509  | 11.7 | 7.8  | 1.3 | NR   | N  | N  | Y | ET      | unclear      | /                                                    | unclear          |
| <b>B_361</b> | 62 | F | 123 | 678  | 10.2 | 4.75 | 1.6 | NR   | N  | N  | N | No MPN  | No MPN       | /                                                    | No MPN           |
| <b>B_362</b> | 41 | F | 135 | 1081 | 7.5  | 4.5  | 0.5 | NR   | N  | N  | N | ET      | ET           | /                                                    | ET               |
| <b>B_363</b> | 78 | F | 138 | 470  | 10.7 | 6.9  | 0.9 | 1,0  | N  | Y  | Y | No MPN  | No MPN       | <b>ASXL G646Wfs*12 (21%) / ASXL1 P808Lfs*10 (7%)</b> | MPN              |
| <b>B_364</b> | 36 | F | 137 | 472  | 10,0 | 4.9  | 1   | NR   | NR | N  | N | unclear | unclear      | <b>STAG2 R1/12L (43%)</b>                            | unclear          |
| <b>B_365</b> | 23 | F | 134 | 714  | 10.2 | 5.3  | 1   | 6.0  | N  | N  | N | ET      | No MPN       | /                                                    | No MPN           |
| <b>A_005</b> | 24 | M | 170 | 511  | 5.97 | 3.5  | 1.3 | 2.2  | Y  | N  | Y | ET      | MPN          | <u>JAK2 T875N (49%)</u>                              | Constitutional T |
| <b>A_036</b> | 27 | F | 131 | 668  | 7.47 | 4.8  | 0.9 | NR   | N  | N  | N | ET      | not reviewed | <u>JAK2 D873E (53%)</u>                              | Constitutional T |
| <b>A_054</b> | 45 | F | 141 | 788  | 9.79 | 8.3  | NR  | 7.4  | Y  | N  | N | ET      | ET           | <u>JAK2 P97A (46%)</u>                               | Constitutional T |



|              |    |   |     |     |      |      |     |     |   |   |   |        |        |                                                   |                  |
|--------------|----|---|-----|-----|------|------|-----|-----|---|---|---|--------|--------|---------------------------------------------------|------------------|
| <b>B_016</b> | 32 | F | 144 | 512 | 8.5  | 5.7  | 0.9 | 4.0 | N | N | N | ET     | No MPN | <u><b>MPL R123Q (47%)</b></u>                     | Constitutional T |
| <b>B_019</b> | 35 | F | 135 | 580 | 13.9 | 10.5 | 0.7 | 2.5 | N | N | Y | No MPN | ET     | <u><b>JAK2 E846D (55%)</b></u>                    | Constitutional T |
| <b>B_021</b> | 39 | F | 131 | 530 | 11.4 | 6.8  | 0.7 | 3.0 | N | N | N | ET     | No MPN | <u><b>MPL G144R (51%)</b></u>                     | Constitutional T |
| <b>B_022</b> | 41 | F | 140 | 588 | 7.9  | 4.7  | 0.8 | NR  | N | N | Y | No MPN | No MPN | <u><b>JAK2 Y613C (49%) / TP53 P278A (22%)</b></u> | Constitutional T |
| <b>B_039</b> | 57 | M | 157 | 468 | 6.8  | 4.3  | 1.1 | NR  | N | N | Y | No MPN | ET     | <u><b>JAK2 R1063H (51%)</b></u>                   | Constitutional T |
| <b>B_040</b> | 58 | F | 148 | 503 | 10.8 | 7.9  | 0.9 | 3.0 | N | N | N | No MPN | No MPN | <u><b>MPL L510Cfs*4 (50%)</b></u>                 | Constitutional T |
| <b>B_059</b> | 71 | F | 146 | 511 | 13.1 | 8.9  | 1.1 | 2,0 | N | Y | Y | ET     | ET     | <u><b>JAK2 Y613C (46%)</b></u>                    | Constitutional T |
| <b>B_347</b> | 38 | M | 139 | 647 | 8.5  | 4.8  | 1.2 | NR  | N | Y | Y | ET     | ET     | <u><b>JAK2 R867Q (50%)</b></u>                    | Constitutional T |
| <b>B_358</b> | 43 | F | 139 | 517 | 13,0 | 9.1  | 1.1 | 1.5 | N | N | Y | ET     | ET     | <u><b>JAK2 R1063H (51%)</b></u>                   | Constitutional T |

**Table S2:** Demographic, biological (Hgb: hemoglobin, Neutro: neutrophils) and clinical characteristics at diagnosis, diagnosis according to each classification and variant description for each patient included in the present study (TN group). Initial diagnosis based on local bone marrow biopsy conclusions was re-evaluated by experts of the GEBOM and diagnosis was reanalysed with NGS results: ET: essential thrombocytemia ; pMF : pre-myelofibrosis; MPN : myeloproliferative neoplasm (unclassifiable); no MPN : not in favour of MPN; Constitutional T: Constitutional thrombocythemia. Variants are typed in bold for pathogenic or likely pathogenic variants and underlined for germline or likely germline variants. VAF: variant allele frequency.
